# Supplementary material for: HDAC6/HNF4α loop mediated by miR-1 promotes bile acids-induced gastric intestinal metaplasia
Source: PubMed Central journal article supplement (PMC7790803; doi:10.1007/s10120-020-01108-x), 2020-07-23
Supplement: 10120_2020_1108_MOESM1_ESM.pdf [file 10120_2020_1108_MOESM1_ESM.pdf]

## Supplementary Figures

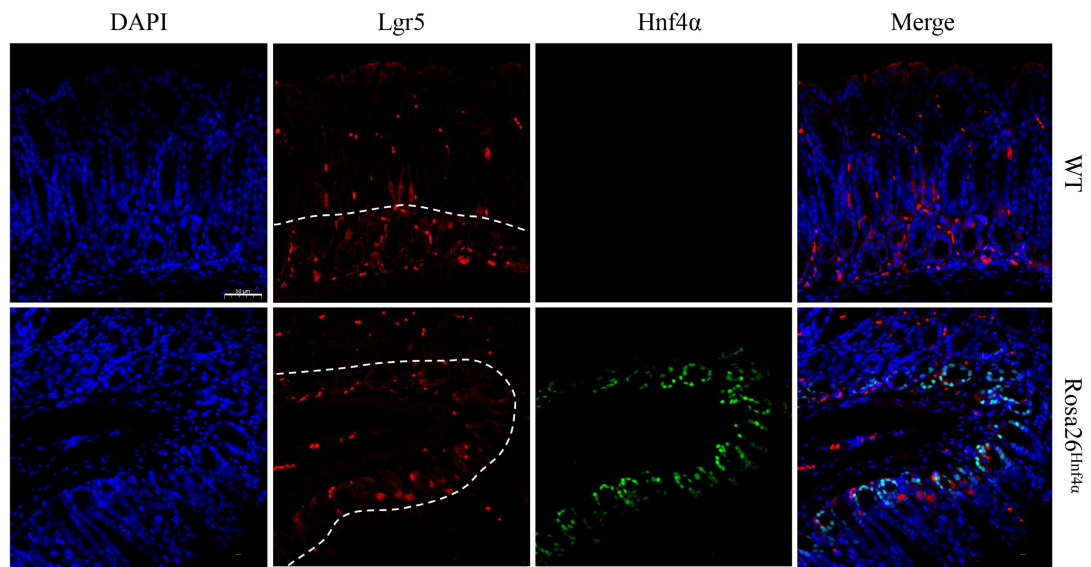

**Figure S1.** Lgr5Cre-mediated active Hnf4 $\alpha$  expression in murine gastric Lgr5+ stem cells. Immunofluorescence (IF) analysis using DAPI (blue), Lgr5 (red, for Lgr5+ cells) and Hnf4 $\alpha$  (green) antibodies in Lgr5+ stem cells from *WT* and *Rosa26<sup>Hnf4α</sup>* antrum 1 day after tamoxifen (Tam) administration. The glandular base of the mucosa is distinguished from the rest of the mucosa by a white dashed line. Scale bars: 50  $\mu$ m.

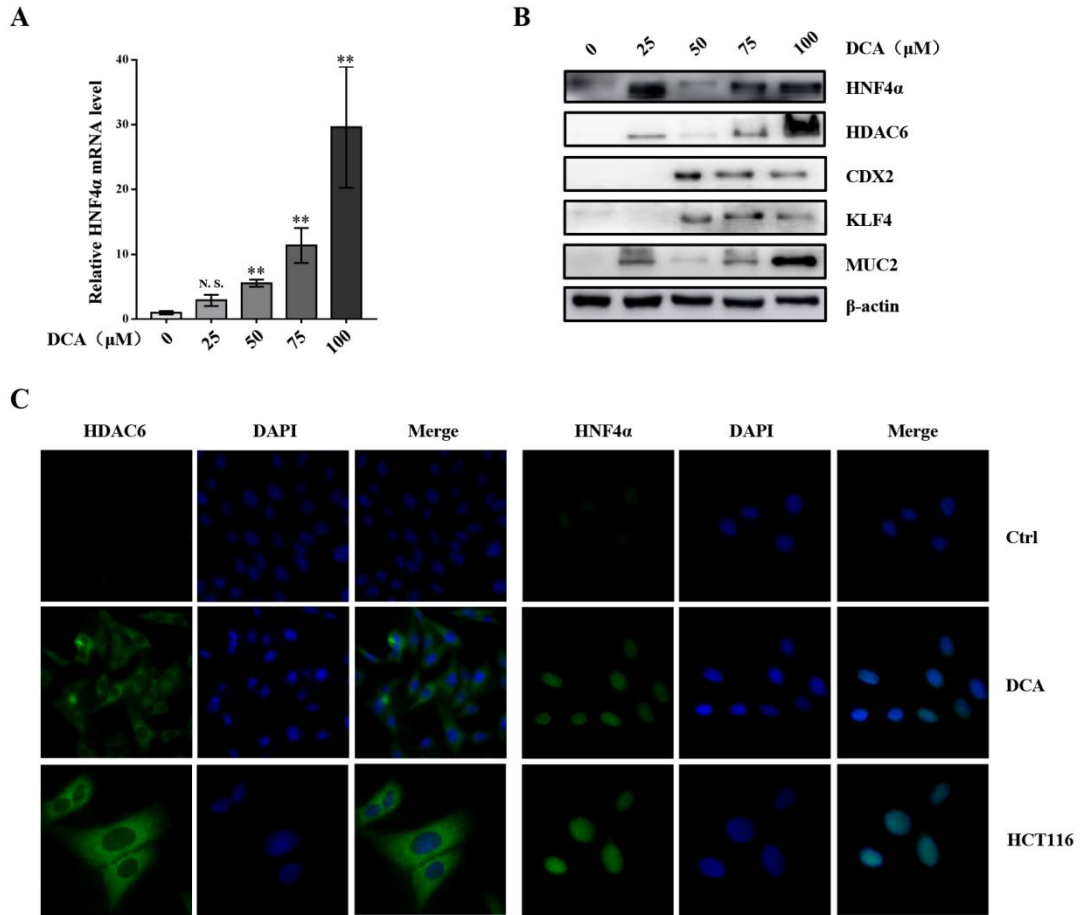

**Figure S2.** DCA induces HDAC6 and HNF4 $\alpha$  expression. (A) HNF4 $\alpha$  mRNA level was increased by DCA treatment. (B) Effects of gradient concentration of DCA on the expression of HDAC6, HNF4 $\alpha$  and intestinal markers (CDX2, MUC2, KLF4) in AZ521 cells. (C) Effects of DCA on HDAC6 and HNF4 $\alpha$  protein expressions in GES-1 cells was determined by immunofluorescence. After incubation with 100 $\mu$ M of the DCA for 24 hours, HDAC6 and HNF4 $\alpha$  positive cells with nuclear staining (DAPI) were observed. HCT116 as a positive control. Representative results of three separate experiments are shown. \* $p < 0.05$ ; \*\* $p < 0.01$ . N.S., not significant.

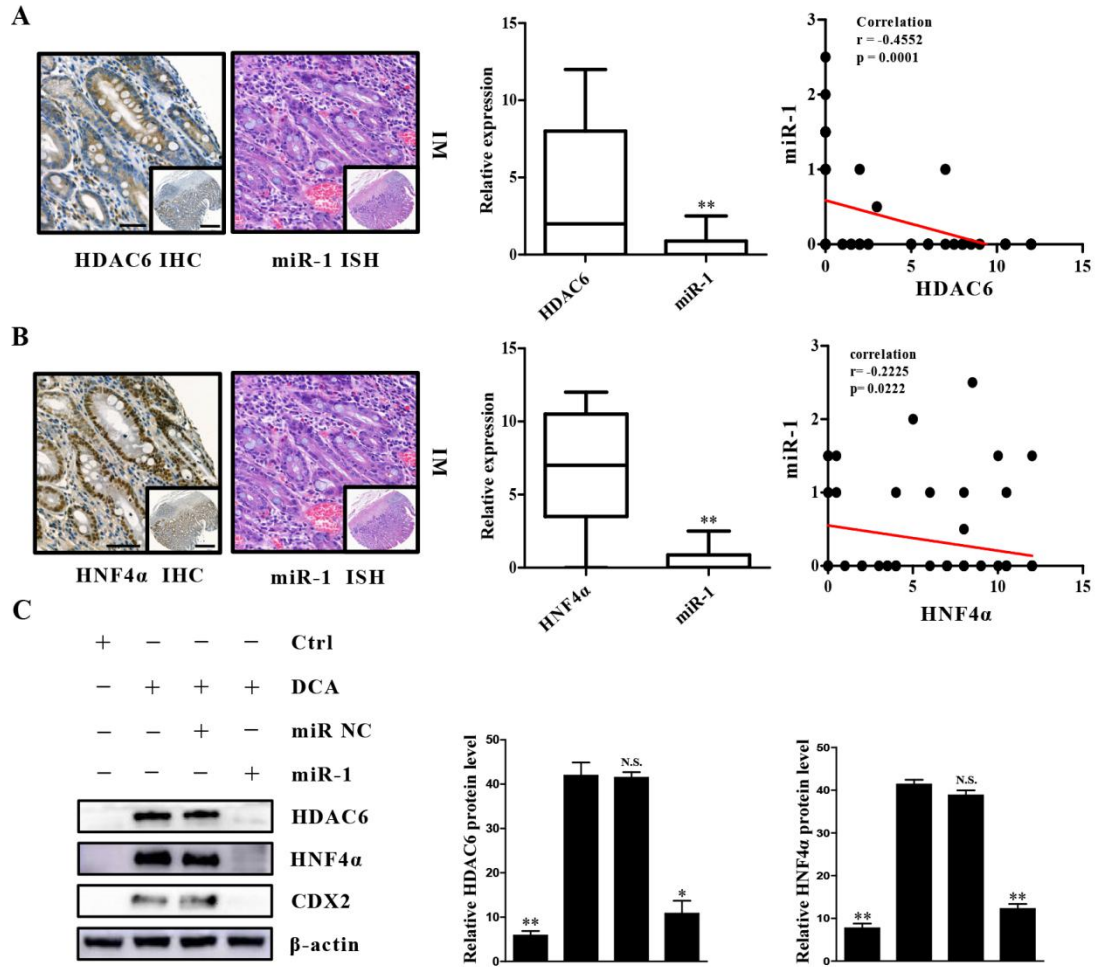

**Figure S3.** MiR-1 inhibits HDAC6 and HNF4α activity by targeting their 3'UTR. IHC and ISH results showed that expression level of HDAC6 (A) and HNF4α (B) was negatively associated with miR-1 in IM tissues. Scale bars: 100 μm; 500 μm (insets). (C) Upregulation of miR-1 resulted in downregulated protein expression of HDAC6, HNF4α and CDX2 in GES-1 cells after DCA. \*p<0.05; \*\*p<0.01. N.S., not significant.
